13 **Abstract**

14 Gut microbiota plays a critical role in the induction of adaptive immune responses to  
15 influenza virus infection. However, the role of nasal bacteria in the induction of the  
16 virus-specific adaptive immunity is less clear. Here we demonstrate that while intranasal  
17 administration of influenza virus hemagglutinin vaccine alone was insufficient to induce  
18 the vaccine-specific antibody responses, disruption of nasal bacteria by lysozyme or  
19 addition of culturable oral bacteria from a healthy human volunteer rescued inability of  
20 the nasal bacteria to generate antibody responses to intranasally administered the  
21 split-virus vaccine. Myd88-dependent signaling in the hematopoietic compartment was  
22 required for adjuvant activity of intranasally administered oral bacteria. In addition, we  
23 found that the oral bacteria-combined intranasal vaccine induced protective antibody  
24 response to influenza virus and SARS-CoV-2 infection. Our findings here have  
25 identified a previously unappreciated role for nasal bacteria in the induction of the  
26 virus-specific adaptive immune responses.

27

28 **Keywords:** mucosal immunity, intranasal vaccine, adjuvant, SARS-CoV-2

## 29 **Introduction**

30 Respiratory infectious diseases such as influenza and coronavirus disease 2019  
31 (COVID-19) cause substantial morbidity and mortality. Influenza A virus is responsible  
32 for annual epidemics that cause severe morbidity and mortality involving 3 to 5 million  
33 people worldwide. In addition, the constant pandemic potential of newly emerging  
34 viruses remains a serious threat to public health, the economy and society as illustrated  
35 by the recent COVID-19 global pandemic. Therefore, there is an urgent need to develop  
36 effective vaccines against not only seasonal influenza viruses but also against severe  
37 acute respiratory syndrome coronavirus 2 (SARS-CoV-2).

38 Since it is difficult to predict which strain of influenza virus or coronavirus cause a  
39 pandemic, it is advantageous to produce vaccines that induce cross-protective immunity  
40 against variants of the particular virus strain. Mucosal immunity induced by natural  
41 infection of influenza virus is more effective and cross-protective against heterologous  
42 virus infection than systemic immunity induced by parenteral vaccines (S. Tamura &  
43 Kurata, 2004). It is believed that the virus-specific IgA in upper respiratory tract is more  
44 cross-protective against heterologous influenza viruses compared with the virus-specific  
45 IgG in the serum due to its dimeric or tetrameric forms (higher avidity) and location  
46 (Liew, Russell, Appleyard, Brand, & Beale, 1984; Suzuki et al., 2015). Indeed,

47 polymeric immunoglobulin receptor-knockout mice failed to secrete nasal IgA and  
48 protect against heterologous virus challenge (Asahi et al., 2002). Therefore, induction of  
49 the virus-specific secretory IgA in the upper respiratory tract by intranasal vaccination  
50 has a great advantage in conferring protection against an unpredictable pandemic of  
51 viral pathogens such as the swine-origin H1N1 and avian-origin H7N9 influenza A  
52 viruses, or zoonotic origin of SARS-CoV-2 (Gao et al., 2013; Neumann, Noda, &  
53 Kawaoka, 2009). In the effort to develop effective intranasal vaccines, several adjuvants  
54 such as cholera toxin (Watanabe et al., 2002), synthetic double-stranded RNA poly(I:C)  
55 (Ichinohe et al., 2005), synthetic toll-like receptor 4 agonist (Spinner et al., 2015),  
56 zymosan (Ainai et al., 2010), flagellin (Skountzou et al., 2010), immune stimulating  
57 complexes (ISCOMs) (Sjolander et al., 2001), or type-I interferons (Bracci et al., 2005)  
58 have been developed to enhance the vaccine-specific nasal IgA response. While upper  
59 respiratory tract contains commensal bacteria (Bassis et al., 2015; Clark, 2020),  
60 intranasal administration of split vaccine alone was insufficient to induce the  
61 vaccine-specific nasal IgA response (Ichinohe et al., 2005; Jangra et al., 2020),  
62 suggesting that the amounts of commensal bacteria in upper respiratory tract are  
63 insufficient to stimulate the vaccine-specific nasal IgA response.

64 A recent study has demonstrated that nasal mucosa-derived *Staphylococcus*  
65 *epidermidis*, one of the most abundant colonizers of healthy human skin and mucosal  
66 surface, suppressed influenza virus replication by stimulating IFN- $\lambda$  production (Kim et  
67 al., 2019). In addition, influenza virus-infected mice lacking both toll-like receptor 7  
68 (TLR7) and mitochondrial antiviral signaling (MAVS) had elevated nasal bacterial  
69 burdens, which resulted in death from pneumonia caused by secondary bacterial  
70 infections (Pillai et al., 2016). In contrast to the role of nasal bacteria in innate antiviral  
71 resistance to influenza virus infection or severity of the disease (Kim et al., 2019; Pillai  
72 et al., 2016), it remains unclear whether nasal bacteria critically regulates the generation  
73 of influenza virus-specific adaptive immune responses after infection or intranasal  
74 vaccination. Here, we show that depletion of nasal bacteria by intranasal administration  
75 of antibiotics enhanced the virus-specific nasal IgA and serum IgG response following  
76 influenza virus infection. In addition, we found that lysozyme-induced disruption of  
77 nasal bacteria or culturable oral bacteria from a healthy volunteer significantly enhanced  
78 the vaccine-specific nasal IgA and serum IgG responses. Myd88-dependent signaling in  
79 the hematopoietic compartment was required for adjuvant activity of intranasally  
80 administered oral bacteria. Our findings here have identified a previously unappreciated  
81 role for nasal bacteria in the induction of the virus-specific adaptive immune responses.

## 82 **Results**

### 83 **Depletion of nasal bacteria enhanced antibodies response to influenza virus**

#### 84 **infection**

85 Gut commensal microbiota play a key role in innate and adaptive immune defense  
86 against influenza virus infection (Abt et al., 2012; Bradley et al., 2019; Ichinohe et al.,  
87 2011; Rosshart et al., 2017; Steed et al., 2017; Stefan, Kim, Iwasaki, & Kasper, 2020).  
88 However, the role of oral or nasal bacteria in the induction of mucosal immune  
89 responses following influenza virus infection remains unknown. To assess the effects of  
90 oral or nasal bacteria in the induction of mucosal immune responses to influenza virus  
91 infection, we treated mice intranasally with an antibiotic cocktail for five consecutive  
92 days before influenza virus infection. This treatment resulted in significant reduction in  
93 the numbers of culturable oral and nasal bacteria (**Supplementary Fig. 1**).  
94 Antibiotic-treated mice were then infected intranasally with a mouse-adapted influenza  
95 A virus strain A/Puerto Rico/8/1934 (PR8). Surprisingly, influenza virus-specific nasal  
96 IgA and serum IgG levels were significantly elevated in the antibiotic-treated group  
97 (**Fig. 1**). This led us to consider the possibility that depletion of commensal bacteria in  
98 upper respiratory tract enhances influenza virus replication, resulting in enhancement of  
99 the virus-specific antibody responses. However, depletion of commensal bacteria in

100 upper respiratory tract significantly reduced influenza virus replication at 2 days post  
101 infection (**Supplementary Fig. 2A**). This is consistent with a previous report showing  
102 that antibiotic treatment significantly reduce influenza virus replication at early time  
103 point (Gopinath et al., 2018). In addition, the viral replication in upper respiratory tract  
104 became comparable between antibiotics-treated and control groups at 3 and 5 days post  
105 infection (**Supplementary Fig. 2B, C**). These data indicated that the levels of influenza  
106 virus replication in upper respiratory tract is unlikely to account for increased the  
107 virus-specific antibody responses in antibiotic-treated animals.

108

109 **Lysozyme-induced disruption of nasal bacteria enhances antibody responses**  
110 **induced by intranasal vaccination**

111 Thus, we next examined the possibility that antibiotic-induced disruption of nasal  
112 bacteria releases pathogen-associated molecular patterns, which may act as adjuvants to  
113 enhance the virus-specific antibody responses. To assess the possibility that disruption  
114 of nasal bacteria acts as adjuvant for intranasal influenza vaccine, we immunized mice  
115 intranasally with influenza virus hemagglutinin (HA) protein and lysozyme to disrupt  
116 nasal bacteria. We used poly(I:C) adjuvant as a positive control (Ichinohe et al., 2005).  
117 Strikingly, we found that intranasal immunization with HA and lysozyme significantly

118 enhanced the HA-specific nasal IgA and serum IgG responses (**Fig. 2**). While upper  
119 respiratory tract contains commensal bacteria (Bassis et al., 2015; Clark, 2020),  
120 intranasal administration of hemagglutinin (HA) vaccine alone was insufficient to  
121 induce the HA-specific antibody responses (**Fig. 2**). Taken together, these results  
122 suggest that disruption of nasal bacteria by intranasal administration of antibiotics or  
123 lysozyme acts as adjuvant for intranasal influenza vaccine.

124

### 125 **Oral bacteria act as adjuvant for intranasal vaccine**

126 While upper respiratory tract contains commensal bacteria (Bassis et al., 2015; Clark,  
127 2020), we found that relative amounts of 16S rRNA and culturable bacteria in nasal  
128 mucosal surface were significantly lower than that in the oral cavity (**Supplementary**  
129 **Fig. 3**). Thus, we next examine whether oral bacteria act as adjuvant for intranasal  
130 vaccine. Intranasal vaccination with HA and culturable oral bacteria from mice or a  
131 healthy volunteer significantly enhanced the HA-specific nasal IgA and serum IgG  
132 responses (**Fig. 3A, B**). In addition, the oral bacteria from a healthy volunteer stimulated  
133 the HA-specific nasal IgA and serum IgG responses in a dose-dependent manner (**Fig.**  
134 **3C, D**). Next, we compared the ability of isolated bacterial strains from oral wash  
135 sample of a healthy volunteer to stimulate the HA-specific antibody responses. To this



136 end, we immunized mice intranasally with HA and *streptococcus salivarius* (*S.*  
137 *salivarius*), *streptococcus parasanguinis* (*S. parasanguinis*), or *streptococcus infantis* (*S.*  
138 *infantis*). Mice immunized with HA and each isolated bacterial strain induced  
139 comparable levels of the HA-specific nasal IgA and serum IgG responses (**Fig. 4**),  
140 suggesting that adjuvant activity of the oral bacteria is unlikely to account for strain  
141 specific.

142

143 **Myd88-depdnent signaling in the hematopoietic compartment is required for**  
144 **adjuvant activity of intranasally administered oral bacteria**

145 Next, we wished to determine the innate immune signaling through  
146 pattern-recognition receptors required for adjuvant activity of the oral bacteria. To this  
147 end, we immunized WT and MyD88-deficient mice intranasally with HA and culturable  
148 oral bacteria from a healthy volunteer and measured the HA-specific nasal IgA and  
149 serum IgG responses. The HA-specific nasal IgA and serum IgG responses were found  
150 to be completely dependent on MyD88 (**Fig. 5A, B**). In addition, lysozyme-induced  
151 disruption of nasal bacteria stimulated the HA-specific nasal IgA and serum IgG  
152 responses in a MyD88-dependent manner (**Fig. 5C, D**). To determine the cellular  
153 compartment responsible for adjuvant activity of oral bacteria, we generated bone

154 marrow (BM) chimeric mice in which only the hematopoietic (WT→MyD88<sup>-/-</sup>) or the  
155 stromal cells (MyD88<sup>-/-</sup>→WT) expressed MyD88. After intranasal vaccination with HA  
156 and oral bacteria, the HA-specific nasal IgA and serum IgG responses were significantly  
157 reduced in MyD88<sup>-/-</sup>→WT BM chimeric mice compared to WT→MyD88<sup>-/-</sup> BM  
158 chimeric mice (**Fig. 6**). These data indicate that MyD88-dependent signaling in the  
159 hematopoietic, but not stromal, compartment is required for adjuvant activity of  
160 intranasally administered oral bacteria.

161

162 **Oral bacteria-combined intranasal vaccine protects from influenza virus and**  
163 **SARS-CoV-2 infection**

164 Finally, we examined protective effects of intranasal vaccination with oral  
165 bacteria-adjuvanted vaccine against influenza virus and SARS-CoV-2 infection. To this  
166 end, we immunized mice intranasally with quadrivalent influenza HA vaccine  
167 containing A/California/7/2009 HA together with culturable oral bacteria or lysozyme.  
168 Two weeks after the second vaccination, we challenged vaccinated mice intranasally  
169 with a heterologous A/Narita/1/2009 (pdm09) strain (**Fig. 7**). Mice immunized with HA  
170 vaccine adjuvanted with oral bacteria or lysozyme significantly reduced the virus titer  
171 compared to control mice immunized with the HA vaccine alone (**Fig. 7**). We next

172 assessed protective effects of intranasal vaccination with oral bacteria-adjuvanted  
173 SARS-CoV-2 spike protein against SARS-CoV-2 infection in Syrian hamsters. To this  
174 end, we immunized hamsters intranasally with a recombinant SARS-CoV-2 spike  
175 protein and culturable oral bacteria from a healthy volunteer. We immunized hamsters  
176 subcutaneously with the spike protein alone as a control. We  
177 Both the spike- and the virus-specific serum IgG levels were significantly elevated in  
178 immunized hamsters (**Fig. 8A, B**). In addition, immunized hamsters significantly  
179 reduced the virus titer compared to naïve animals following high-dose ( $2 \times 10^6$  pfu of  
180 SARS-CoV-2) challenge (**Fig. 8C**). These data collectively indicated that disruption of  
181 nasal bacteria or intranasal administration of oral bacteria compensate inability of nasal  
182 bacteria to generate protective adaptive immunity to intranasally administered split  
183 vaccines.

184

185

186 **Discussion**

187 The innate immune system, the first line of defense against pathogens, utilizes pattern  
188 recognition receptors (PRRs) to detect pathogen-associated molecular patterns (PAMPs).  
189 The recognition of influenza virus by PRRs plays a key role not only in limiting virus  
190 replication at early stages of infection, but also in initiating the virus-specific adaptive  
191 immune responses. In addition, previous studies have demonstrated that gut commensal  
192 microbiota play a key role in innate and adaptive immune defense against influenza  
193 virus infection (Abt et al., 2012; Bradley et al., 2019; Ichinohe et al., 2011; Rosshart et  
194 al., 2017; Steed et al., 2017; Stefan et al., 2020). Further, recent studies have indicated  
195 the roles of nasal bacteria in innate antiviral resistance to influenza virus infection or  
196 severity of the diseases (Kim et al., 2019; Pillai et al., 2016). However, it remains  
197 unclear whether nasal bacteria critically regulates the generation of influenza  
198 virus-specific adaptive immune responses after influenza virus infection. In this study,  
199 we demonstrated that depletion of commensal bacteria in upper respiratory tract by  
200 intranasal administration of antibiotics enhanced the virus-specific antibodies response  
201 following influenza virus infection. Surprisingly, depletion of nasal bacteria by  
202 intranasal administration of antibiotics before influenza virus infection significantly  
203 reduced the virus titer at 2 days post infection. This is consistent with a previous report

204 showing that antibiotic treatment significantly reduce influenza virus replication at 6  
205 hours post infection (Gopinath et al., 2018). Intranasal application of antibiotics  
206 suppressed influenza virus replication through at least two possible mechanisms. First,  
207 intranasal administration of antibiotics enhances host resistance to influenza virus  
208 infection in a microbiota-independent manner (Gopinath et al., 2018). Second,  
209 disruption of nasal bacteria by intranasal antibiotic treatment may release PAMPs from  
210 the antibiotic-killed bacteria, which stimulate innate antiviral immune responses to  
211 suppress influenza virus replication (Matsuo et al., 2000). After 3 and 5 days post  
212 infection, the viral replication in upper respiratory tract became comparable between  
213 antibiotic-treated and control groups, indicating that the levels of influenza virus  
214 replication in upper respiratory tract is unlikely to account for increased levels of the  
215 virus-specific antibodies response in antibiotic-treated mice.

216 Since the primary targets of influenza virus are the nasal epithelial cells in upper  
217 respiratory tract, it is beneficial to induce the virus-specific nasal IgA antibody at the  
218 nasal mucosal epithelium. However, intranasal vaccination with split-virus vaccine  
219 alone is often insufficient to elicit proper immune responses at the upper respiratory  
220 tract. Therefore, adjuvants are required for a given vaccine to induce the  
221 vaccine-specific nasal IgA response. In developing intranasal vaccines, cholera toxin

222 (CT) and *Escherichia coli* heat-labile toxin (LT) have been used as adjuvant to enhance  
223 nasal immune response (S. I. Tamura & Kurata, 2000). Although CT and LT are  
224 effective adjuvants to enhance mucosal immune responses including secretory IgA  
225 responses, they have some side effects in humans, including Bell's palsy and nasal  
226 discharge (Mutsch et al., 2004). Therefore, several adjuvants that are as effective as CT  
227 or LT and are also safe for human use have been developed for clinical application with  
228 intranasal influenza vaccine (Ainai et al., 2010; Bracci et al., 2005; Ichinohe et al.,  
229 2005; Sjolander et al., 2001; Skountzou et al., 2010; Spinner et al., 2015). In this study,  
230 we show that intranasal vaccination with influenza virus HA vaccine and culturable oral  
231 bacteria from a healthy human volunteer induced significant levels of the  
232 vaccine-specific nasal IgA and serum IgG responses in a dose-dependent manner. All  
233 commensal bacterial strains tested, including *S. salivarius*, *S. parasanguinis*, or *S.*  
234 *infantis*, induced comparable levels of the HA-specific nasal IgA and serum IgG  
235 responses, suggesting that adjuvant activity of the oral bacteria is unlikely to account for  
236 strain specific. In addition to culturable oral bacteria from a healthy human volunteer,  
237 we demonstrated that disruption of nasal bacteria by lysozyme induced significant  
238 levels of the vaccine-specific antibodies response. Although relative amounts of nasal  
239 bacteria were significantly lower than that in the oral cavity, disruption of nasal bacteria

240 by lysozyme could rescue the inability of nasal bacteria to generate the vaccine-specific  
241 antibodies response. In mice, nasal commensal microbiota are predominantly composed  
242 of gram-positive bacteria including *Lactobacillus spp.*, *Bacillus spp.*, *Staphylococcus*  
243 *spp.*, and *Streptococcus spp.* (Ichinohe et al., 2011). In addition, *Lactobacillus spp.* were  
244 found to contain higher amounts of double-stranded RNA than the pathogenic bacteria  
245 (Kawashima et al., 2013). Since activation of TLRs by different PAMPs such as  
246 poly(I:C) and zymosan synergistically enhanced the nasal IgA response to intranasally  
247 administered influenza virus HA vaccine (Ainai et al., 2010), disruption of nasal  
248 bacteria could stimulate different TLRs to enhance the vaccine-specific antibodies  
249 response. Most TLRs signal through the adaptor protein MyD88 (Kawai & Akira, 2010;  
250 Medzhitov, 2001). Although nasal epithelial cells express various TLRs (Tengroth et al.,  
251 2014; van Tongeren et al., 2015), deficiency of MyD88 in stromal compartment did not  
252 significantly affect the levels of nasal IgA and serum IgG responses following intranasal  
253 vaccination with influenza virus HA and culturable oral bacteria. Instead,  
254 MyD88-dependent signaling in the hematopoietic cells were required for adjuvant  
255 activity of intranasally administered oral bacteria. These data are consistent with  
256 previous studies showing that both TLR-induced dendritic cell maturation and B-cell

257 activation are required for optimal antibody responses to T-dependent antigens (Iwasaki  
258 & Medzhitov, 2015; Pasare & Medzhitov, 2005).

259 In summary, our study demonstrated the effects of commensal microbiota in upper  
260 respiratory tract in the induction of the virus-specific adaptive immune responses after  
261 influenza virus infection or intranasal vaccination. Our data indicated that disruption of  
262 nasal bacteria by lysozyme or supplementation of oral bacteria from a healthy volunteer  
263 enhanced nasal IgA and serum IgG antibodies response to intranasally administered  
264 influenza virus HA or SARS-CoV-2 S proteins. Although the vaccinated animals  
265 significantly reduced the virus titer compared to unadjuvanted group or naïve animals  
266 following high-dose of influenza virus or SARS-CoV-2 challenge, further studies are  
267 needed to establish the safety and efficacy of this vaccination method in an additional  
268 animal model such as nonhuman primate.

269

270



271 **Materials and methods**

272 **Mice**

273 Age- and sex-matched Balb/c mice obtained from Japan SLC, Inc. were used as WT  
274 controls. MyD88-deficient Balb/c mice were a gift from T. Taniguchi. All animal  
275 experiments were performed in accordance with the University of Tokyo's Regulations  
276 for Animal Care and Use, which were approved by the Animal Experiment Committee  
277 of the Institute of Medical Science, the University of Tokyo (approval number PA17–  
278 69).

279

280 **Cells**

281 Madin-Darby canine kidney (MDCK) cells were grown in Eagle's minimal essential  
282 medium (E-MEM; Nacalai Tesque) supplemented with 10% fetal bovine serum (FBS),  
283 penicillin (100 U/ml), and streptomycin (100 µg/ml). VeroE6 cells stably expressing  
284 transmembrane protease serine 2 (VeroE6/TMPRSS2; JCRB Cell Bank 1819) were  
285 maintained in Dulbecco's modified Eagle's medium (DMEM) low glucose  
286 (Cat#08456-65; Nacalai Tesque) supplemented with 10% FBS, penicillin (100 U/ml),  
287 streptomycin (100 µg/ml), and G418 (1mg/ml) (Matsuyama et al., 2020).

288

289 **Depletion of nasal bacteria *in vivo***

290 The antibiotic cocktail consisted of ampicillin sodium salt (1 g/L), neomycin sulfate  
291 (1 g/L), metronidazole (1 g/L), vancomycin hydrochloride (0.5 g/L), gentamicin (10  
292 mg/L), penicillin (100 U/ml), streptomycin (100 U/ml), and amphotericin B (0.25 mg/L)  
293 (Moriyama & Ichinohe, 2019). For intranasal treatment, mice were anaesthetized and 5  
294  $\mu$ l of antibiotic was administered dropwise into each nostril using a pipette tip. All  
295 antibiotics with the exception of vancomycin hydrochloride were obtained from Nacalai  
296 Tesque. Vancomycin hydrochloride was obtained from Duchefa Biochemie.

297

298 **Virus infection**

299 WT A/Puerto Rico/8/34 (A/PR8) and A/Narita/1/09 (pdm09) influenza viruses were  
300 grown in allantoic cavities of 10-d-old fertile chicken egg at 35 °C for 2 d (Moriyama et  
301 al., 2020). Viral titer was quantified by a standard plaque assay using MDCK cells and  
302 viral stock was stored at -80 °C (Moriyama, Koshiba, & Ichinohe, 2019). For intranasal  
303 infection, mice were fully anesthetized by i.p. injection of pentobarbital sodium  
304 (Somnopentyl, Kyoritsu Seiyaku Co., Ltd., Tokyo, Japan) and then infected by  
305 intranasal application of 30  $\mu$ l of virus suspension (1,000 pfu of A/PR8 or pdm09 in  
306 PBS). This procedure leads to upper and lower respiratory tract infection (Moriyama &

307 Ichinohe, 2019).

308 SARS-CoV-2 (a gift from Y. Kawaoka) was amplified on VeroE6/TMPRSS2 cells  
309 and stored at  $-80^{\circ}\text{C}$  until use. The infectious titer was determined by a standard plaque  
310 assay using VeroE6/TMPRSS2 cells, as described previously (Imai et al., 2020). For  
311 intranasal infection, one-month-old female Syrian hamsters (Japan SLC Inc.) were fully  
312 anesthetized by i.p. injection of pentobarbital sodium (Somnopentyl, Kyoritsu Seiyaku  
313 Co., Ltd., Tokyo, Japan) and then infected intranasally with  $2 \times 10^6$  pfu (in 100  $\mu\text{L}$ ) of  
314 SARS-CoV-2. All experiments with SARS-CoV-2 were performed in enhanced  
315 biosafety level 3 (BSL-3) containment laboratories at the University of Tokyo, in  
316 accordance with the institutional biosafety operating procedures.

317

### 318 **Vaccination**

319 For intranasal infection, mice were fully anesthetized by i.p. injection of pentobarbital  
320 sodium (Somnopentyl, Kyoritsu Seiyaku Co., Ltd., Tokyo, Japan) and then infected  
321 intranasally by dropping 2  $\mu\text{L}$  of PBS containing 1,000 pfu of A/PR8 into the nostril.  
322 The quadrivalent inactivated influenza vaccine (split-product virus vaccines,  
323 hemagglutinin [HA] vaccine) prepared for the 2015–2016 season and including  
324 A/California/7/2009 (H1N1), A/Switzerland/9715293/2013 (H3N2),

325 B/Phuket/3073/2013, and B/Texas/2/2013 were purchased from Kaketsuken  
326 (Kumamoto, Japan). Mice were immunized by intranasal administration of the  
327 quadrivalent HA vaccine containing 150 ng of each HA with or without 5 µg of  
328 lipopolysaccharide (LPS; InvivoGen), 5 µg of poly(I:C) (InvivoGen), 250 µg of  
329 lysozyme (Thermo Fisher Scientific), or 1 mg of culturable oral bacteria from a healthy  
330 volunteer.

331 SARS-CoV-2 spike S1+S2 ECD-His recombinant protein was purchased from Sino  
332 Biological Inc. (Cat# 40589-V08B1). Hamsters were immunized subcutaneously or  
333 intranasally with 1 µg of the recombinant spike protein with or without 1 mg of  
334 culturable oral bacteria from a healthy volunteer.

335

### 336 **Clinical specimens**

337 Oral and nasal washes were collected from a healthy volunteer by rinsing the mouth  
338 with 50 ml of saline or washing the nasal cavity with 50 ml of saline using a syringe.

339 The research protocol was approved by the Research Ethics Review Committee of the  
340 Institute of Medical Science, the University of Tokyo (approval number 2019-42-1121).

341 For preparation of oral bacteria adjuvant, oral wash samples were grown in brain heart  
342 infusion broth (BD 237500) at 37 °C overnight, washed repeatedly, and resuspended in

343 PBS (200 µg/ml).

344

### 345 **Bacterial recovery and identification**

346 Oral and nasal washes were collected from a healthy volunteer as described above.

347 Aliquots of 100µl of serial 10-fold dilution of the oral and nasal wash were inoculated

348 into brain heart infusion agar plates (BD 252109). After incubation at 37 °C overnight

349 under the aerobic conditions, the bacterial colonies were grown in brain heart infusion

350 broth (BD 237500) at 37 °C overnight. Bacterial DNA was isolated as described

351 previously (Moriyama & Ichinohe, 2019). A 300-bp portion of the 16S rRNA was

352 amplified by PCR using specific primer pairs of 515F

353 (5'-GTGCCAGCMGCCGCGGTAA-3') and 806R

354 (5'-GGACTACHVGGGTWTCTAAT-3'), purified (Qiagen), sequenced, and the

355 sequence compared by Blast analysis to known bacterial sequences.

356

### 357 **Bone marrow chimera**

358 Bone marrow chimeras were generated as described (Pang, Ichinohe, & Iwasaki,

359 2013). WT and MyD88-deficient mice were γ-irradiated with 6 Gy, then were

360 reconstituted with  $5 \times 10^6$  bone marrow cells of the appropriate genotype via i.v.

361 injection and allowed to recover for 8 weeks before vaccination.

362

### 363 **Measurement of virus titers**

364 For measurement of influenza virus titer, bronchoalveolar (BAL) fluid was collected  
365 by washing the trachea and lungs of mice twice by injecting a total of 2 ml PBS  
366 containing 0.1% bovine serum albumin (BSA). The virus titer was measured as follows:  
367 aliquots of 200 µl of serial 10-fold dilution of the BAL fluid by PBS containing 0.1%  
368 BSA were inoculated into MDCK cells in 6-well plates. After 1 hour of incubation,  
369 cells were washed with PBS thoroughly and overlaid with 2 ml of agar medium.

370 For measurement of SARS-CoV-2 titer, BAL fluid was collected by washing the  
371 trachea and lungs of hamsters twice by injecting a total of 2 ml DMEM containing 5%  
372 FBS. The virus titer was measured as follows: aliquots of 200 µl of serial 10-fold  
373 dilution of the BAL fluid by DMEM containing 5% FBS were inoculated into  
374 VeroE6/TMPRSS2 cells in 6-well plates. After 1 hour of incubation, cells were washed  
375 with PBS thoroughly and overlaid with 2 ml of agar medium. The number of plaques in  
376 each well was counted 2 days after inoculation.

377

### 378 **Enzyme-linked immunosorbent assay (ELISA)**

379 Serum and nasal wash were collected from the immunized mice for measurement of  
380 the PR8- or HA-specific nasal IgA and serum IgG antibodies. Nasal wash was collected  
381 by washing the nasopharynx three times by injecting a total of 1 ml PBS containing  
382 0.1% BSA. The levels of the PR8- or HA-specific nasal IgA and serum IgG antibodies  
383 were determined by ELISA as described previously (Moriyama & Ichinohe, 2019).  
384 Standards for PR8- or HA-reactive IgA and IgG antibody titration were prepared from  
385 the nasal wash or serum of the virus-infected or vaccinated mice, and expressed as the  
386 same arbitrary units (160-unit). The antibody titers of unknown specimens were  
387 determined from the standard regression curve constructed by two fold serial dilution of  
388 the 160-unit standard for each assay.

389

### 390 **Quantification and statistical analysis**

391 Statistical significance was tested by one-way ANOVA followed by Tukey test or  
392 unpaired t tests with PRISM software (Version 5; GraphPad software). Data are  
393 presented as mean  $\pm$  SEM. Statistical details can be found directly in the figure legends.  
394 P values of less than 0.05 were considered statistically significant.

395

396 **ACKNOWLEDGMENTS**

397 We thank Y. Kawaoka (University of Wisconsin and University of Tokyo) for  
398 providing SARS-CoV-2 and T. Taniguchi (The University of Tokyo) for  
399 MyD88-deficient mice. This work was supported by the Japan Society for the  
400 Promotion of Science Grants-in-Aid for Scientific Research (20H03491), the Research  
401 Program on Emerging and Re-emerging Infectious Diseases, of the Japan Agency for  
402 Medical Research and Development (AMED), the Yakult Bio-Science Foundation, the  
403 Hitachi Global Foundation, and the Mitsubishi foundation. M. M. is the Research  
404 Fellow of the Japan Society for the Promotion of Science.

405

406 **Competing interests statement**

407 The authors declare no competing financial interests.

408



409 **REFERENCES**

- 410 Abt, M. C., Osborne, L. C., Monticelli, L. A., Doering, T. A., Alenghat, T., Sonnenberg,  
411 G. F., . . . Artis, D. (2012). Commensal bacteria calibrate the activation  
412 threshold of innate antiviral immunity. *Immunity*, 37(1), 158-170.  
413 doi:S1074-7613(12)00237-3 [pii]  
414 10.1016/j.immuni.2012.04.011
- 415 Ainaï, A., Ichinohe, T., Tamura, S., Kurata, T., Sata, T., Tashiro, M., & Hasegawa, H.  
416 (2010). Zymosan enhances the mucosal adjuvant activity of poly(I:C) in a nasal  
417 influenza vaccine. *J Med Virol*, 82(3), 476-484. doi:10.1002/jmv.21694
- 418 Asahi, Y., Yoshikawa, T., Watanabe, I., Iwasaki, T., Hasegawa, H., Sato, Y., . . .  
419 Tamura, S. (2002). Protection against influenza virus infection in polymeric Ig  
420 receptor knockout mice immunized intranasally with adjuvant-combined  
421 vaccines. *J Immunol*, 168(6), 2930-2938.
- 422 Bassis, C. M., Erb-Downward, J. R., Dickson, R. P., Freeman, C. M., Schmidt, T. M.,  
423 Young, V. B., . . . Huffnagle, G. B. (2015). Analysis of the upper respiratory  
424 tract microbiotas as the source of the lung and gastric microbiotas in healthy  
425 individuals. *MBio*, 6(2), e00037. doi:10.1128/mBio.00037-15
- 426 Bracci, L., Canini, I., Puzelli, S., Sestili, P., Venditti, M., Spada, M., . . . Proietti, E.  
427 (2005). Type I IFN is a powerful mucosal adjuvant for a selective intranasal  
428 vaccination against influenza virus in mice and affects antigen capture at  
429 mucosal level. *Vaccine*, 23(23), 2994-3004. doi:10.1016/j.vaccine.2004.12.006
- 430 Bradley, K. C., Finsterbusch, K., Schnepf, D., Crotta, S., Llorian, M., Davidson, S., . . .  
431 Wack, A. (2019). Microbiota-Driven Tonic Interferon Signals in Lung Stromal  
432 Cells Protect from Influenza Virus Infection. *Cell Rep*, 28(1), 245-256 e244.  
433 doi:10.1016/j.celrep.2019.05.105
- 434 Clark, S. E. (2020). Commensal bacteria in the upper respiratory tract regulate  
435 susceptibility to infection. *Curr Opin Immunol*, 66, 42-49.  
436 doi:10.1016/j.coi.2020.03.010
- 437 Gao, R., Cao, B., Hu, Y., Feng, Z., Wang, D., Hu, W., . . . Shu, Y. (2013). Human  
438 infection with a novel avian-origin influenza A (H7N9) virus. *N Engl J Med*,  
439 368(20), 1888-1897. doi:10.1056/NEJMoa1304459
- 440 Gopinath, S., Kim, M. V., Rakib, T., Wong, P. W., van Zandt, M., Barry, N. A., . . .  
441 Iwasaki, A. (2018). Topical application of aminoglycoside antibiotics enhances  
442 host resistance to viral infections in a microbiota-independent manner. *Nat*  
443 *Microbiol*, 3(5), 611-621. doi:10.1038/s41564-018-0138-2

- 444 Ichinohe, T., Pang, I. K., Kumamoto, Y., Peaper, D. R., Ho, J. H., Murray, T. S., &  
445 Iwasaki, A. (2011). Microbiota regulates immune defense against respiratory  
446 tract influenza A virus infection. *Proc Natl Acad Sci U S A*, *108*(13), 5354-5359.  
447 doi:1019378108 [pii]  
448 10.1073/pnas.1019378108
- 449 Ichinohe, T., Watanabe, I., Ito, S., Fujii, H., Moriyama, M., Tamura, S., . . . Hasegawa,  
450 H. (2005). Synthetic double-stranded RNA poly(I:C) combined with mucosal  
451 vaccine protects against influenza virus infection. *J Virol*, *79*(5), 2910-2919.  
452 doi:10.1128/JVI.79.5.2910-2919.2005
- 453 Imai, M., Iwatsuki-Horimoto, K., Hatta, M., Loeber, S., Halfmann, P. J., Nakajima,  
454 N., . . . Kawaoka, Y. (2020). Syrian hamsters as a small animal model for  
455 SARS-CoV-2 infection and countermeasure development. *Proc Natl Acad Sci U*  
456 *S A*, *117*(28), 16587-16595. doi:10.1073/pnas.2009799117
- 457 Iwasaki, A., & Medzhitov, R. (2015). Control of adaptive immunity by the innate  
458 immune system. *Nat Immunol*, *16*(4), 343-353. doi:10.1038/ni.3123
- 459 Jangra, S., De Vrieze, J., Choi, A., Rathnasinghe, R., Laghlali, G., Uvyn, A., . . .  
460 Schotsaert, M. (2020). Sterilizing Immunity against SARS-CoV-2 Infection in  
461 Mice by a Single-Shot and Modified Imidazoquinoline TLR7/8  
462 Agonist-Adjuvanted Recombinant Spike Protein Vaccine. *bioRxiv*.  
463 doi:10.1101/2020.10.23.344085
- 464 Kawai, T., & Akira, S. (2010). The role of pattern-recognition receptors in innate  
465 immunity: update on Toll-like receptors. *Nat Immunol*, *11*(5), 373-384.  
466 doi:10.1038/ni.1863
- 467 Kawashima, T., Kosaka, A., Yan, H., Guo, Z., Uchiyama, R., Fukui, R., . . . Tsuji, N. M.  
468 (2013). Double-stranded RNA of intestinal commensal but not pathogenic  
469 bacteria triggers production of protective interferon-beta. *Immunity*, *38*(6),  
470 1187-1197. doi:10.1016/j.immuni.2013.02.024
- 471 Kim, H. J., Jo, A., Jeon, Y. J., An, S., Lee, K. M., Yoon, S. S., & Choi, J. Y. (2019).  
472 Nasal commensal *Staphylococcus epidermidis* enhances  
473 interferon-lambda-dependent immunity against influenza virus. *Microbiome*,  
474 *7*(1), 80. doi:10.1186/s40168-019-0691-9
- 475 Liew, F. Y., Russell, S. M., Appleyard, G., Brand, C. M., & Beale, J. (1984).  
476 Cross-protection in mice infected with influenza A virus by the respiratory route  
477 is correlated with local IgA antibody rather than serum antibody or cytotoxic T  
478 cell reactivity. *Eur J Immunol*, *14*(4), 350-356. doi:10.1002/eji.1830140414

- 479 Matsuo, K., Yoshikawa, T., Asanuma, H., Iwasaki, T., Hagiwara, Y., Chen, Z., . . .  
480 Tamura, S. I. (2000). Induction of innate immunity by nasal influenza vaccine  
481 administered in combination with an adjuvant (cholera toxin). *Vaccine*, *18*(24),  
482 2713-2722. doi:10.1016/s0264-410x(00)00055-4
- 483 Matsuyama, S., Nao, N., Shirato, K., Kawase, M., Saito, S., Takayama, I., . . . Takeda,  
484 M. (2020). Enhanced isolation of SARS-CoV-2 by TMPRSS2-expressing cells.  
485 *Proc Natl Acad Sci U S A*, *117*(13), 7001-7003. doi:10.1073/pnas.2002589117
- 486 Medzhitov, R. (2001). Toll-like receptors and innate immunity. *Nat Rev Immunol*, *1*(2),  
487 135-145. doi:10.1038/35100529
- 488 Moriyama, M., & Ichinohe, T. (2019). High ambient temperature dampens adaptive  
489 immune responses to influenza A virus infection. *Proc Natl Acad Sci U S A*,  
490 *116*(8), 3118-3125. doi:10.1073/pnas.1815029116
- 491 Moriyama, M., Koshiba, T., & Ichinohe, T. (2019). Influenza A virus M2 protein  
492 triggers mitochondrial DNA-mediated antiviral immune responses. *Nat Commun*,  
493 *10*(1), 4624. doi:10.1038/s41467-019-12632-5
- 494 Moriyama, M., Nagai, M., Maruzuru, Y., Koshiba, T., Kawaguchi, Y., & Ichinohe, T.  
495 (2020). Influenza Virus-Induced Oxidized DNA Activates Inflammasomes.  
496 *iScience*, *23*(7), 101270. doi:10.1016/j.isci.2020.101270
- 497 Mutsch, M., Zhou, W., Rhodes, P., Bopp, M., Chen, R. T., Linder, T., . . . Steffen, R.  
498 (2004). Use of the inactivated intranasal influenza vaccine and the risk of Bell's  
499 palsy in Switzerland. *N Engl J Med*, *350*(9), 896-903.  
500 doi:10.1056/NEJMoa030595
- 501 Neumann, G., Noda, T., & Kawaoka, Y. (2009). Emergence and pandemic potential of  
502 swine-origin H1N1 influenza virus. *Nature*, *459*(7249), 931-939.  
503 doi:10.1038/nature08157
- 504 Pang, I. K., Ichinohe, T., & Iwasaki, A. (2013). IL-1R signaling in dendritic cells  
505 replaces pattern-recognition receptors in promoting CD8(+) T cell responses to  
506 influenza A virus. *Nat Immunol*, *14*(3), 246-253. doi:ni.2514 [pii]  
507 10.1038/ni.2514
- 508 Pasare, C., & Medzhitov, R. (2005). Control of B-cell responses by Toll-like receptors.  
509 *Nature*, *438*(7066), 364-368. doi:10.1038/nature04267
- 510 Pillai, P. S., Molony, R. D., Martinod, K., Dong, H., Pang, I. K., Tal, M. C., . . . Iwasaki,  
511 A. (2016). Mx1 reveals innate pathways to antiviral resistance and lethal  
512 influenza disease. *Science*, *352*(6284), 463-466. doi:10.1126/science.aaf3926
- 513 Rosshart, S. P., Vassallo, B. G., Angeletti, D., Hutchinson, D. S., Morgan, A. P., Takeda,  
514 K., . . . Rehermann, B. (2017). Wild Mouse Gut Microbiota Promotes Host

- 515 Fitness and Improves Disease Resistance. *Cell*, 171(5), 1015-1028 e1013.  
516 doi:10.1016/j.cell.2017.09.016
- 517 Sjolander, S., Drane, D., Davis, R., Beezum, L., Pearse, M., & Cox, J. (2001). Intranasal  
518 immunisation with influenza-ISCOM induces strong mucosal as well as  
519 systemic antibody and cytotoxic T-lymphocyte responses. *Vaccine*, 19(28-29),  
520 4072-4080. doi:10.1016/s0264-410x(01)00110-4
- 521 Skountzou, I., Martin Mdel, P., Wang, B., Ye, L., Koutsonanos, D., Weldon, W., . . .  
522 Compans, R. W. (2010). Salmonella flagellins are potent adjuvants for  
523 intranasally administered whole inactivated influenza vaccine. *Vaccine*, 28(24),  
524 4103-4112. doi:10.1016/j.vaccine.2009.07.058
- 525 Spinner, J. L., Oberoi, H. S., Yorgensen, Y. M., Poirier, D. S., Burkhart, D. J., Plante,  
526 M., & Evans, J. T. (2015). Methylglycol chitosan and a synthetic TLR4 agonist  
527 enhance immune responses to influenza vaccine administered sublingually.  
528 *Vaccine*, 33(43), 5845-5853. doi:10.1016/j.vaccine.2015.08.086
- 529 Steed, A. L., Christophi, G. P., Kaiko, G. E., Sun, L., Goodwin, V. M., Jain, U., . . .  
530 Stappenbeck, T. S. (2017). The microbial metabolite desaminotyrosine protects  
531 from influenza through type I interferon. *Science*, 357(6350), 498-502.  
532 doi:10.1126/science.aam5336
- 533 Stefan, K. L., Kim, M. V., Iwasaki, A., & Kasper, D. L. (2020). Commensal Microbiota  
534 Modulation of Natural Resistance to Virus Infection. *Cell*.  
535 doi:10.1016/j.cell.2020.10.047
- 536 Suzuki, T., Kawaguchi, A., Ainai, A., Tamura, S., Ito, R., Multihartina, P., . . .  
537 Hasegawa, H. (2015). Relationship of the quaternary structure of human  
538 secretory IgA to neutralization of influenza virus. *Proc Natl Acad Sci U S A*,  
539 112(25), 7809-7814. doi:10.1073/pnas.1503885112
- 540 Tamura, S., & Kurata, T. (2004). Defense mechanisms against influenza virus infection  
541 in the respiratory tract mucosa. *Jpn J Infect Dis*, 57(6), 236-247.
- 542 Tamura, S. I., & Kurata, T. (2000). A proposal for safety standards for human use of  
543 cholera toxin (or Escherichia coli heat-labile enterotoxin) derivatives as an  
544 adjuvant of nasal inactivated influenza vaccine. *Jpn J Infect Dis*, 53(3), 98-106.
- 545 Tengroth, L., Millrud, C. R., Kvarnhammar, A. M., Kumlien Georen, S., Latif, L., &  
546 Cardell, L. O. (2014). Functional effects of Toll-like receptor (TLR)3, 7, 9,  
547 RIG-I and MDA-5 stimulation in nasal epithelial cells. *PLoS One*, 9(6), e98239.  
548 doi:10.1371/journal.pone.0098239
- 549 van Tongeren, J., Roschmann, K. I. L., Reinartz, S. M., Luiten, S., Fokkens, W. J., de  
550 Jong, E. C., & van Drunen, C. M. (2015). Expression profiling and functional

551 analysis of Toll-like receptors in primary healthy human nasal epithelial cells  
552 shows no correlation and a refractory LPS response. *Clin Transl Allergy*, 5, 42.  
553 doi:10.1186/s13601-015-0086-3  
554 Watanabe, I., Hagiwara, Y., Kadowaki, S. E., Yoshikawa, T., Komase, K., Aizawa,  
555 C., . . . Tamura, S. (2002). Characterization of protective immune responses  
556 induced by nasal influenza vaccine containing mutant cholera toxin as a safe  
557 adjuvant (CT112K). *Vaccine*, 20(29-30), 3443-3455.  
558 doi:10.1016/s0264-410x(02)00351-1  
559

560 **Figure legends**

561 **Figure 1. Disruption of nasal bacteria enhances the virus-specific antibody**

562 **responses following influenza virus infection.**

563 **(A and B)** Mice were inoculated intranasally with an antibiotic cocktail (Abx) for 5

564 consecutive days. Two days later, mice were intranasally infected with 1,000 pfu of

565 A/PR8 virus. The nasal wash and serum were collected at 4 weeks p.i., and the

566 virus-specific nasal IgA and serum IgG titers were determined by ELISA. Open circles

567 indicate values for individual mice. The data are from three independent experiments

568 (mean  $\pm$  SEM). \* $P < 0.05$  and \*\*\* $P < 0.001$ ; (one-way ANOVA and Tukey's test).

569

570 **Figure 2. Disruption of nasal bacteria induces the HA-specific antibody responses**

571 **after intranasal vaccination.**

572 **(A and B)** Mice were immunized intranasally with quadrivalent HA vaccine with or

573 without poly(I:C) or lysozyme twice in a 3-week interval. Two weeks later, the nasal

574 wash and serum were collected and the HA-specific nasal IgA and serum IgG titers

575 were determined by ELISA. Open circles indicate values for individual mice. The data

576 are from three independent experiments (mean  $\pm$  SEM). \*\* $P < 0.01$  and \*\*\* $P < 0.001$ ;

577 (one-way ANOVA and Tukey's test).

578

579 **Figure 3. Oral bacteria acts as adjuvant for intranasal vaccine.**

580 **(A and B)** Mice were immunized intranasally with quadrivalent HA vaccine with or  
581 without LPS, poly(I:C), or culturable oral bacteria from mice or a healthy volunteer  
582 twice in a 3-week interval. Two weeks later, the nasal wash and serum were collected  
583 and the HA-specific nasal IgA and serum IgG titers were determined by ELISA. **(C and**  
584 **D)** Mice were immunized intranasally with quadrivalent HA vaccine with or without  
585 indicated amounts of oral bacteria from a healthy volunteer twice in a 3-week interval.  
586 Two weeks later, the nasal wash and serum were collected and the HA-specific nasal  
587 IgA and serum IgG titers were determined by ELISA. Open circles indicate values for  
588 individual mice. The data are from two independent experiments (mean  $\pm$  SEM). \* $P$  <  
589 0.05, \*\* $P$  < 0.01 and \*\*\* $P$  < 0.001; (one-way ANOVA and Tukey's test).

590

591 **Figure 4. Adjuvant activity of *S. salivarius*, *S. parasanguinis*, and *S. infantis* for**  
592 **intranasal vaccine.**

593 **(A and B)** Mice were immunized intranasally with quadrivalent HA vaccine with or  
594 without *S. salivarius*, *S. parasanguinis*, or *S. infantis* twice in a 3-week interval. Two  
595 weeks later, the nasal wash and serum were collected and the HA-specific nasal IgA and

596 serum IgG titers were determined by ELISA. Open circles indicate values for individual  
597 mice. The data are from two independent experiments (mean  $\pm$  SEM). \* $P$  < 0.05, \*\* $P$  <  
598 0.01 and \*\*\* $P$  < 0.001; (one-way ANOVA and Tukey's test).

599

600 **Figure 5. Oral bacteria acts as adjuvant for intranasal vaccine.**

601 (A-D) WT and MyD88-deficient mice were immunized intranasally with quadrivalent  
602 HA vaccine with or without culturable oral bacteria from a healthy volunteer (A and B)  
603 or lysozyme (C and D) twice in a 3-week interval. Two weeks later, the nasal wash and  
604 serum were collected and the HA-specific nasal IgA and serum IgG titers were  
605 determined by ELISA. Open circles indicate values for individual mice. The data are  
606 from two independent experiments (mean  $\pm$  SEM). \*\*\* $P$  < 0.001; (one-way ANOVA  
607 and Tukey's test).

608

609 **Figure 6. Oral bacteria acts as adjuvant for intranasal vaccine.**

610 (A and B) WT $\rightarrow$ MyD88 KO and MyD88 KO $\rightarrow$ WT BM chimeric mice were  
611 immunized intranasally with quadrivalent HA vaccine with or without culturable oral  
612 bacteria from a healthy volunteer twice in a 3-week interval. Two weeks later, the nasal  
613 wash and serum were collected and the HA-specific nasal IgA and serum IgG titers



614 were determined by ELISA. Open circles indicate values for individual mice. The data  
615 are from two independent experiments (mean  $\pm$  SEM). \*\*\* $P < 0.001$ ; (one-way  
616 ANOVA and Tukey's test).

617

618 **Figure 7. Protective effects of oral bacteria-adjuvanted intranasal vaccine against**  
619 **influenza virus infection.**

620 Mice were immunized intranasally with quadrivalent HA vaccine with or without  
621 culturable oral bacteria from a healthy volunteer or lysozyme twice in a 3-week interval.  
622 Two weeks after the last vaccination, mice were challenged with 1,000 pfu of A/PR8  
623 virus. The nasal wash of influenza virus-infected mice was collected at 3 days post  
624 infection, and viral titers were determined by plaque assay. Open circles indicate values  
625 for individual mice. The dashed line indicates the limit of virus detection. The data are  
626 from two independent experiments (mean  $\pm$  SEM). \*\*\* $P < 0.001$ ; (one-way ANOVA  
627 and Tukey's test).

628

629 **Figure 8. Protective effects of oral bacteria-adjuvanted intranasal vaccine against**  
630 **SARS-CoV-2 infection.**

631 (A-C) Hamsters were immunized subcutaneously or intranasally with the spike protein  
632 of SARS-CoV-2 with or without culturable oral bacteria from a healthy volunteer twice  
633 in a 3-week interval. Two weeks after the last vaccination, hamsters were challenged  
634 with  $2 \times 10^6$  pfu of SARS-CoV-2. (A and B) Serum were collected at 3 days post  
635 infection. The spike protein- (A) or SARS-CoV-2- (B) specific serum IgG antibody  
636 titers were determined by ELISA. (C) The lung wash of SARS-CoV-2-infected  
637 hamsters was collected at 3 days post infection, and viral titers were determined by  
638 plaque assay. Open circles indicate values for individual hamsters. The data are from  
639 two independent experiments (mean  $\pm$  SEM). \* $P < 0.05$  and \*\* $P < 0.01$ ; (one-way  
640 ANOVA and Tukey's test).  
641

Figure 1

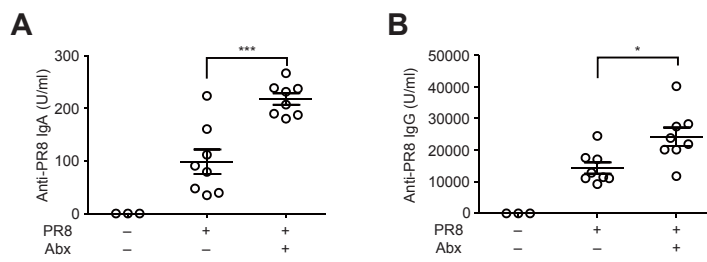

Figure 2

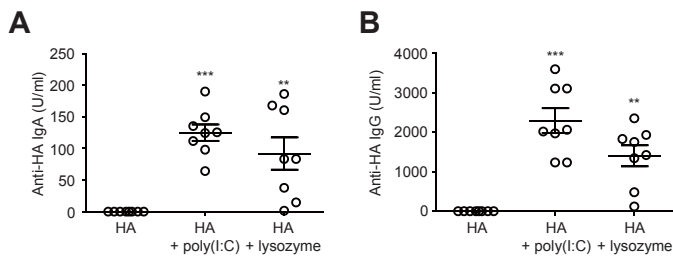

Figure 3

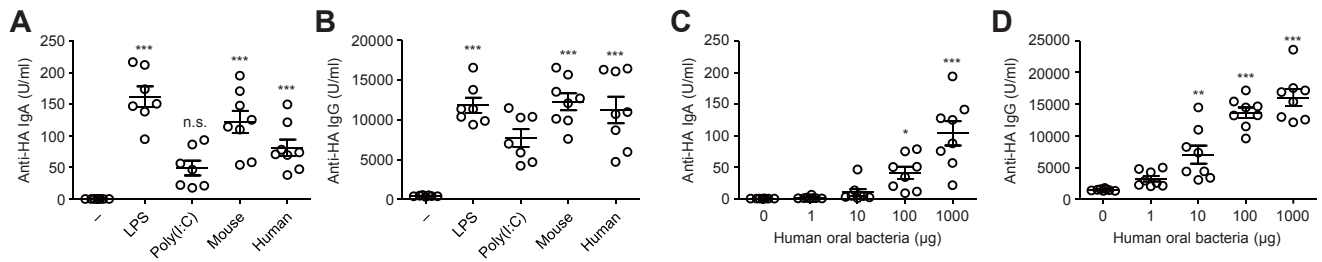

Figure 4

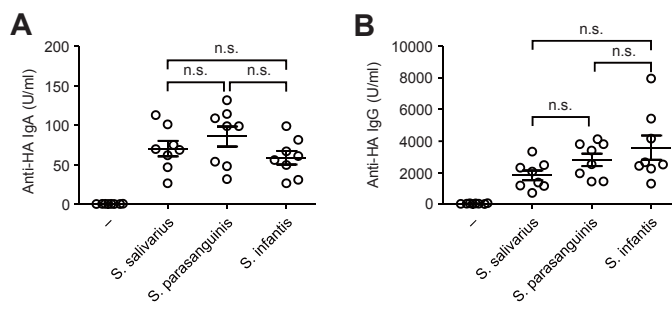

Figure 5

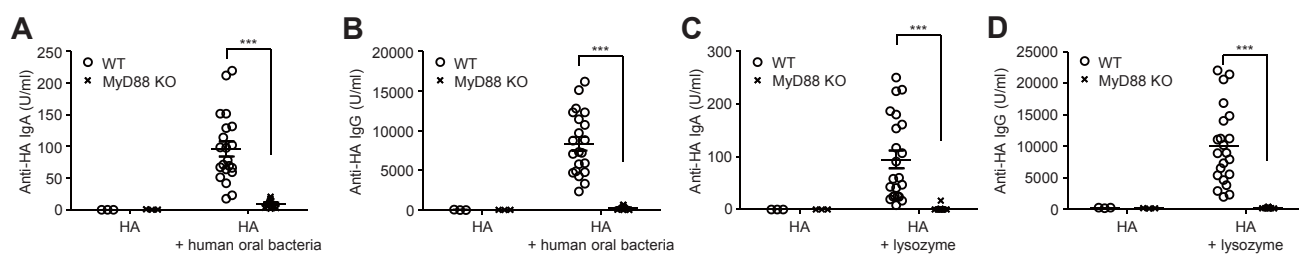

Figure 6

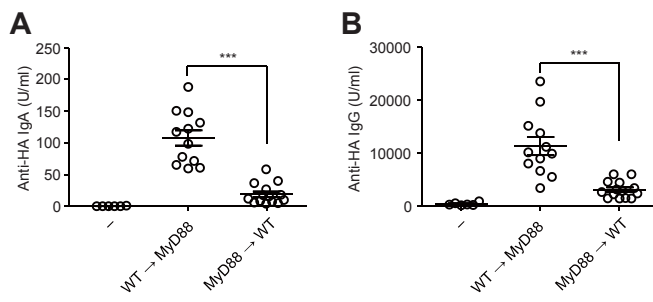



Figure 7

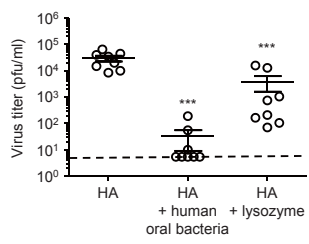

Figure 8

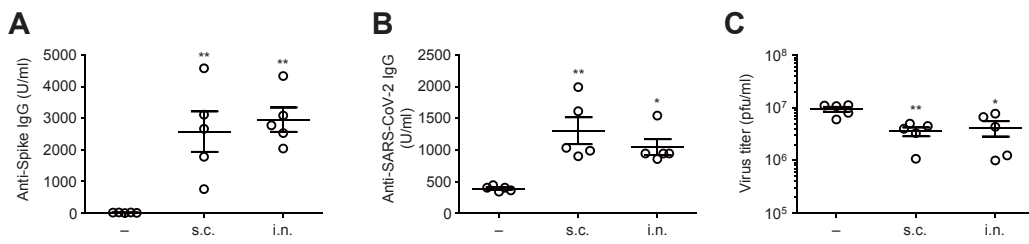

Source: https://www.biorxiv.org/content/10.1101/2020.12.25.424300v1.full.pdf
